# Supplementary material
Source: PubMed Central journal article supplement (PMC2823448)
Supplement: supp_M109.074252_jbc.M109.074252-1.pdf [file supp_M109.074252_jbc.M109.074252-1.pdf]

**Supplemental  
Table 1**

| <b>Gene<br/>(Symbol)</b> | <b>Well</b> | <b>Fold<br/>Difference</b> | <b>Fold Up- or Down-<br/>Regulation</b> | <b>p value</b> |
|--------------------------|-------------|----------------------------|-----------------------------------------|----------------|
| Akt1                     | A01         | 0.87                       | -1.14                                   | 0.107          |
| Apaf1                    | A02         | 1.02                       | 1.02                                    | 0.842          |
| Api5                     | A03         | 0.76                       | -1.32                                   | <b>0.023</b>   |
| Atf5                     | A04         | 0.91                       | -1.10                                   | 0.240          |
| Bad                      | A05         | 0.86                       | -1.16                                   | 0.226          |
| Bag1                     | A06         | 0.62                       | -1.62                                   | <b>0.002</b>   |
| Bag3                     | A07         | 0.72                       | -1.38                                   | 0.008          |
| Bak1                     | A08         | 1.01                       | 1.01                                    | 0.806          |
| Bax                      | A09         | 1.18                       | 1.18                                    | <b>0.038</b>   |
| Bcl10                    | A10         | 1.19                       | 1.19                                    | 0.650          |
| Bcl2                     | A11         | 0.88                       | -1.14                                   | 0.194          |
| Bcl2l1                   | A12         | 0.45                       | -2.22                                   | <b>0.004</b>   |
| Bcl2l10                  | B01         | 0.93                       | -1.07                                   | 0.598          |
| Bcl2l2                   | B02         | 0.90                       | -1.11                                   | 0.299          |
| Bid                      | B03         | 0.72                       | -1.40                                   | <b>0.030</b>   |
| Naip1                    | B04         | 0.99                       | -1.01                                   | 0.993          |
| Naip2                    | B05         | 0.86                       | -1.17                                   | 0.189          |
| Birc2                    | B06         | 0.65                       | -1.53                                   | <b>0.038</b>   |
| Birc3                    | B07         | 0.73                       | -1.37                                   | 0.164          |
| Xiap                     | B08         | 0.80                       | -1.25                                   | <b>0.026</b>   |
| Birc5                    | B09         | 1.54                       | 1.54                                    | <b>0.037</b>   |
| Bnip2                    | B10         | 0.87                       | -1.15                                   | <b>0.038</b>   |
| Bnip3                    | B11         | 0.58                       | -1.72                                   | <b>0.003</b>   |
| Bnip3l                   | B12         | 0.59                       | -1.69                                   | <b>0.001</b>   |
| Bok                      | C01         | 1.05                       | 1.05                                    | 0.763          |
| Card10                   | C02         | 0.65                       | -1.54                                   | <b>0.016</b>   |
| Nod1                     | C03         | 0.98                       | -1.02                                   | 0.934          |
| Card6                    | C04         | 0.58                       | -1.71                                   | <b>0.009</b>   |
| Casp1                    | C05         | 1.19                       | 1.19                                    | 0.244          |
| Casp12                   | C06         | 1.12                       | 1.12                                    | 0.535          |
| Casp14                   | C07         | 0.74                       | -1.35                                   | 0.742          |
| Casp2                    | C08         | 0.74                       | -1.35                                   | 0.122          |
| Casp3                    | C09         | 1.75                       | 1.75                                    | <b>0.035</b>   |
| Casp4                    | C10         | 0.81                       | -1.23                                   | 0.237          |
| Casp6                    | C11         | 0.65                       | -1.55                                   | 0.036          |
| Casp7                    | C12         | 0.93                       | -1.07                                   | 0.752          |
| Casp8                    | D01         | 0.83                       | -1.21                                   | 0.137          |
| Casp9                    | D02         | 0.84                       | -1.19                                   | 0.193          |
| Cflar                    | D03         | 0.85                       | -1.17                                   | <b>0.001</b>   |
| Cidea                    | D04         | 1.31                       | 1.31                                    | 0.184          |
| Cideb                    | D05         | 0.18                       | -5.53                                   | 0.125          |

|           |     |      |       |              |
|-----------|-----|------|-------|--------------|
| Cradd     | D06 | 0.87 | -1.15 | 0.489        |
| Dad1      | D07 | 0.64 | -1.55 | 0.057        |
| Dapk1     | D08 | 0.62 | -1.60 | <b>0.018</b> |
| Dffa      | D09 | 0.78 | -1.29 | 0.063        |
| Dffb      | D10 | 0.75 | -1.33 | 0.192        |
| Tsc22d3   | D11 | 0.57 | -1.75 | <b>0.010</b> |
| Fadd      | D12 | 1.00 | 1.00  | 0.972        |
| Fas       | E01 | 1.16 | 1.16  | 0.184        |
| Fasl      | E02 | 1.54 | 1.54  | 0.174        |
| Hells     | E03 | 1.14 | 1.14  | 0.393        |
| Il10      | E04 | 1.46 | 1.46  | 0.105        |
| Lhx4      | E05 | 1.40 | 1.40  | 0.685        |
| Ltbr      | E06 | 1.04 | 1.04  | 0.719        |
| Mcl1      | E07 | 0.87 | -1.15 | <b>0.011</b> |
| Nfkb1     | E08 | 0.77 | -1.30 | 0.054        |
| Nme5      | E09 | 0.17 | -6.00 | 0.166        |
| Nol3      | E10 | 1.11 | 1.11  | 0.506        |
| Pak7      | E11 | 0.62 | -1.61 | 0.494        |
| Pim2      | E12 | 0.83 | -1.21 | 0.610        |
| Polb      | F01 | 0.75 | -1.34 | 0.054        |
| Prdx2     | F02 | 0.90 | -1.11 | 0.153        |
| Pycard    | F03 | 1.06 | 1.06  | 0.612        |
| Ripk1     | F04 | 0.77 | -1.30 | <b>0.005</b> |
| Rnf7      | F05 | 0.77 | -1.29 | 0.069        |
| Sphk2     | F06 | 0.84 | -1.19 | 0.157        |
| Tnf       | F07 | 3.27 | 3.27  | <b>0.003</b> |
| Tnfrsf10b | F08 | 1.31 | 1.31  | <b>0.042</b> |
| Tnfrsf11b | F09 | 1.31 | 1.31  | 0.051        |
| Tnfrsf1a  | F10 | 0.77 | -1.30 | <b>0.023</b> |
| Cd40      | F11 | 1.12 | 1.12  | 0.708        |
| Tnfsf10   | F12 | 1.54 | 1.54  | <b>0.045</b> |
| Tnfsf12   | G01 | 0.87 | -1.15 | 0.129        |
| Cd40lg    | G02 | 0.99 | -1.01 | 0.963        |
| Cd70      | G03 | 1.69 | 1.69  | 0.182        |
| Traf1     | G04 | 0.88 | -1.14 | 0.228        |
| Traf2     | G05 | 0.75 | -1.34 | 0.194        |
| Traf3     | G06 | 1.00 | -1.00 | 0.981        |
| Trp53     | G07 | 0.72 | -1.39 | <b>0.028</b> |
| Trp53bp2  | G08 | 0.64 | -1.57 | 0.100        |
| Trp53inp1 | G09 | 0.25 | -4.06 | <b>0.005</b> |
| Trp63     | G10 | 1.96 | 1.96  | 0.283        |
| Trp73     | G11 | 0.16 | -6.31 | 0.234        |
| Zc3hc1    | G12 | 0.80 | -1.25 | 0.113        |
| Gusb      | H01 | 1.68 | 1.68  | <b>0.001</b> |
| Hprt1     | H02 | 0.91 | -1.10 | 0.126        |
| Hsp90ab1  | H03 | 0.74 | -1.35 | <b>0.022</b> |
| Gapdh     | H04 | 0.86 | -1.16 | 0.240        |
| Actb      | H05 | 1.02 | 1.02  | 0.822        |

P values in bold represent those who achieved statistical significance at  $p < 0.05$
